# Supplementary material for: Spatial variability of microzooplankton grazing on phytoplankton in coastal southern Florida, USA
Source: PeerJ journal article supplement (doi:10.7717/peerj.13291), 2022-04-25
Supplement: SI_Figure_1.pdf [file SI_Figure_1.pdf]

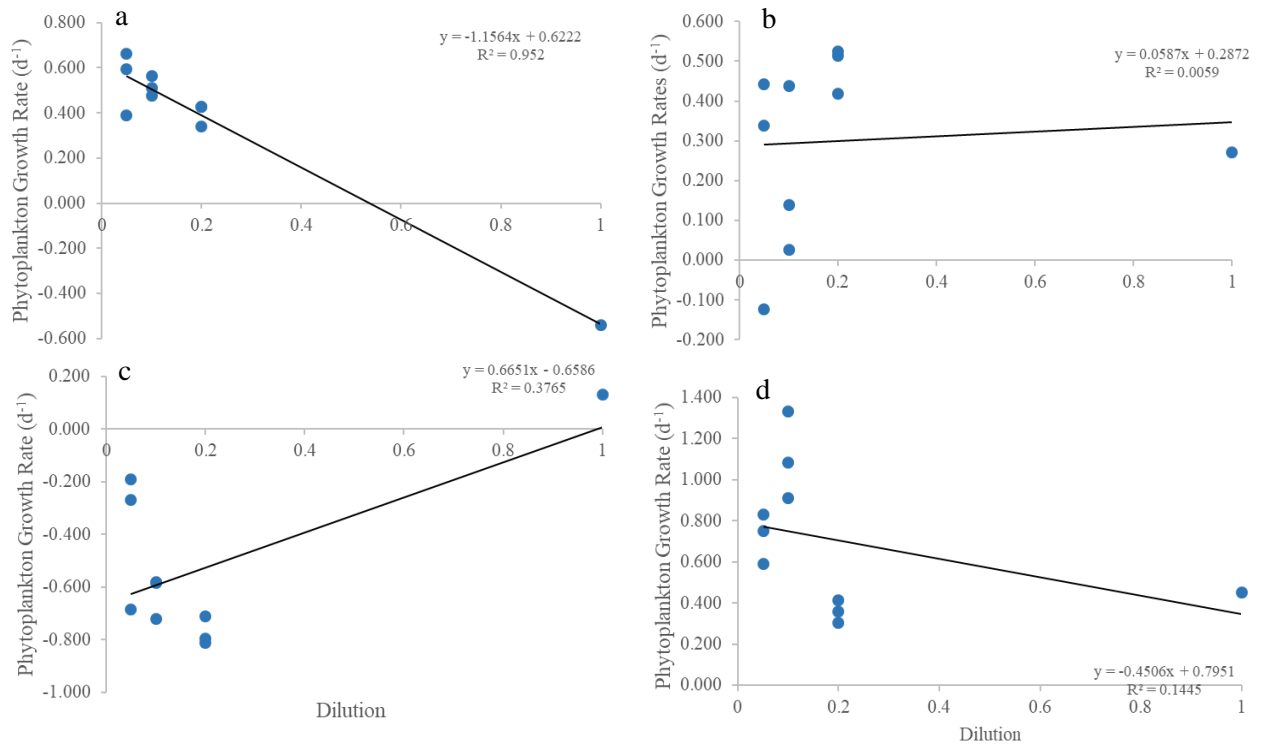

**SI Figure 1. Visual representation of different dilution experiment results.**

(a) Standard (expected) dilution experiments results from each station with fitted linear regression line and associated equation (MR – 10/12/2018). (b) Zero microzooplankton grazing results with fitted linear regression line and associated equation (MR – 3/9/2018). (c) Negative slopes with fitted linear regression line and associated equations (MR – 7/31/2019). (d) Dilution experiments with non-linear regression results (MR – 11/20/2019).
