# Supplementary material for: Spatial variability of microzooplankton grazing on phytoplankton in coastal southern Florida, USA
Source: PeerJ. 2022 Apr 25;10:e13291. doi: 10.7717/peerj.13291 (PMC9048640; doi:10.7717/peerj.13291)
Supplement: Supplemental Information 4 — The chlorophyll a concentrations for each dilution experiment, the oxygen concentration for each primary production experiment, and all the environmental data collected at each station. The data is organized based on individual cruises. [file peerj-10-13291-s004.xlsx]

## Sheet: WS18008
Cruise Code: WS18008
Cruise Start Date: 01/08/2018
Dilution Experiments							Primary production experiments (light-dark bottles)
Chlorophyll a concnetrations (µg chl a L-1)							O2 concentrations (umol/L)								Enviromental data
	MR	21/LK	WS	57	54			MR	21/LK	WS	57	54			NH4 (uM)	PO4 (uM)	NOx (uM)	NO3 (uM)	NO2 (uM)	Si (uM)	Temp (℃)	Salinity
100-I	0.359056	0.483684	0.671416	2.05169	6.17147		T0-A	229.511	228.166	225.457	259.897	263.175		MR	0.779	0.071	0.039	0.01	0.029	2.004	23.98	36.36
20-I	0.0665736	0.102542	0.129677	0.556568	1.78623		T0-B	231.27	226.688	230.167	260.033	265.074		21/LK	3.303	0.068	0.057	0	0.085	2.203	23.2	36.04
10-I	0.0388083	0.0511134	0.0697288	0.339915	0.829173		T0-C	229.734	227.879	226.106	260.878	270.449		WS	0.676	0.05	0.121	0.059	0.062	2.63	23.67	36.13
5-I	0.0201929	0.0306049	0.0340756	0.0917096	0.387032		Dark-A	230.992	234.82	213.598	266.742	249.608		57	1.224	0.056	0.037	0	0.052	12.079	17.21	33.58
100-A	0.381457	0.677305	0.746298	1.36429	5.8039		Dark-B	232.031	235.251	213.579	267.544	249.414		54	1.226	0.027	0.009	0	0.045	18.578	17.28	31.66
100-B							Dark-C	233.204	213.172	213.639	268.282	250.251
100-C							Screen-A	234.042	217.189	216.561	270.684	283.208
20-A	0.182052	0.268819	0.229274	0.755132	2.2166		Screen-B	237.227	217.679	215.877	278.672	283.747
20-B	0.153656	0.336549	0.24484	0.779953	1.95914		Screen-C	236.828	218.502	215.925	277.687	283.544
20-C	0.192149	0.182157	0.238529	0.884704	2.25698
10-A	0.0927614	0.121999	0.120737	0.496831	1.31591
10-B	0.0889752	0.118213	0.129571	0.463596	1.37186
10-C	0.0918148	0.114006	0.139247	0.428679	1.35335
5-A	0.053953	0.0875028	0.0715167	0.364735	0.751346
5-B	0.0489048	0.0811925	0.0567927	0.358004	0.546472
5-C	0.0574237	0.063103	0.0689926	0.31888	0.891435

## Sheet: SAV18069
Cruise Code: SAV18069
Cruise Start Date: 03/10/2018
Dilution Experiments							Primary production experiments (light-dark bottles)
Chlorophyll a concnetrations (µg chl a L-1)							O2 concentrations (umol/L)								Enviromental data
	MR	21/LK	WS	57	54			MR	21/LK	WS	57	54			NH4 (uM)	PO4 (uM)	NOx (uM)	NO3 (uM)	NO2 (uM)	Si (uM)	Temp (℃)	Salinity
100-I	0.16	0.19	0.42	4.48	0.92		T0-A	220.602	215.541	214.582	241.607	245.418		MR	0.861	0.03	0.037	0	0.037	1.448	24.79	36.29
20-I	0.0347066	0.0378618	0.100334	0.98693	0.249572		T0-B	220.118	216.834	215.812	241.214	243.076		21/LK	1.177	0.091	0.343	0.3	0.043	1.433	24.73	36.27
10-I	0.0233481	0.021455	0.0523755	0.574868	0.106644		T0-C	221.086	214.041	215.824	240.369	239.877		WS	0.784	0.089	0.015	0	0.037	1.811	24.61	36.26
5-I	0.0164068	0.0141982	0.0249257	0.307942	0.0463807		Dark-A	213.328	230.054	224.698	217.087	220.037		57	1.893	0.14	0.044	0.003	0.041	28.465	21.2	35.82
100-A	0.21	0.22	0.48	2.61	0.52		Dark-B	213.44	231.636	226.315	216.456	220.443		54	2.366	0.122	0.034	0.008	0.026	16.634	20.28	32
100-B							Dark-C	213.57	232.694	225.896	218.004	220.849
100-C							Screen-A	217.204	236.748	236.692	249.581	237.108
20-A	0.0580547	0.0511134	0.229064	0.835799	0.319617		Screen-B	217.19	232.522	236.331	247.778	237.802
20-B	0.052691	0.041648	0.240107	0.999867	0.359687		Screen-C	217.176	230.148	238.052	246.73	238.592
20-C	0.0586858	0.031867	0.213919	0.855361	0.249572
10-A	0.0268188	0.0274498	0.171325	0.529118	0.255883
10-B	0.0239791	0.0189309	0.112954	0.678041	0.210133
10-C	0.036179	0.0224016	0.146714	0.734519	0.218967
5-A	0.0230326	0.0107275	0.0725684	0.306365	0.146399
5-B	0.0255567	0.0164068	0.0678357	0.503562	0.147976
5-C	0.0145137	0.0151447	0.0817183	0.45024	0.103489

## Sheet: WS18120
Cruise Code: WS18210
Cruise Start Date: 04/30/2018
Dilution Experiments							Primary production experiments (light-dark bottles)
Chlorophyll a concnetrations (µg chl a L-1)							O2 concentrations (umol/L)								Enviromental data
	MR	21/LK	WS	57	54			MR	21/LK	WS	57	54			NH4 (uM)	PO4 (uM)	NOx (uM)	NO3 (uM)	NO2 (uM)	Si (uM)	Temp (℃)	Salinity
100-I	0.151	2.582	0.577	1.936	4.753		T0-A	208.075	205.162	212.064	214.699	251.835		MR	0.086	0.097	0.042	0.021	0.021	1.331	26.48	36.55
20-I	0.0369152	0.0647857	0.132727		0.238529		T0-B	207.918	205.322	210.738	215.629	253.747		21/LK	0.139	0.06	0.022	0.014	0.008	1.307	25.7	36.51
10-I	0.0189309	0.0365997	0.064365	0.586858	0.120316		T0-C	220.816	205.483	209.289	216.675	251.976		WS	0.08	0.034	0.051	0.041	0.01	1.563	26.32	36.69
5-I	0.0293429	0.0235584	0.0351273	0.274288	0.102858		Dark-A	210.839	202.964	191.265	196.087	202.145		57	0.219	0.122	0	0	0.009	35.645	26.48	36.31
100-A	0.145	1.141	0.652	3.009	1.636		Dark-B	212.607	200.586	193.486	193.144	208.973		54	0.302	0.098	0.054	0.034	0.02	42.991	26.22	32.74
100-B							Dark-C	210.357	201.817	190.13	191.217	203.965
100-C							Screen-A	213.144	217.787	207.704	214.397	254.77
20-A	0.0684667	0.125154	0.13462	0.442352	3.37496		Screen-B	209.917	218.754	207.561	212.902	251.85
20-B	0.0653116	0.14114	0.145347	0.415428	2.72289		Screen-C	213.032	218.4	207.436	211.328	251.918
20-C	0.0896062	0.13504	0.144506	MISSING	2.79883
10-A	0.0593168	0.0513237	0.0933924	1.40951	2.62256
10-B	0.0444876	0.0744615	0.115478	0.294481	2.68103
10-C	0.0457497	0.064365	0.115478	0.267977	2.12341
5-A	0.0252412	0.0473272	0.08582	0.182578	1.64509
5-B	0.053322	0.0410169	0.0727788	0.145347	MISSING
5-C	0.0545841	0.0378618	0.0622616	1.73007	0.188468

## Sheet: SAV18173
Cruise Code: SAV18173
Cruise Start Date: 06/22/2018
Dilution Experiments							Primary production experiments (light-dark bottles)
Chlorophyll a concnetrations (µg chl a L-1)							O2 concentrations (umol/L)								Enviromental data
	MR	21/LK	WS	57	54			MR	21/LK	WS	57	54			NH4 (uM)	PO4 (uM)	NOx (uM)	NO3 (uM)	NO2 (uM)	Si (uM)	Temp (℃)	Salinity
100-I	0.176	0.257	0.271	9.077	0.862		T0-A	218.448	214.175	212.673	208.645	177.51		MR	0.164	0.042	0.14	0.137	0.003	1.064	29.09	36.21
20-I	0.028817	0.0441721	0.0443824	1.88341	0.18994		T0-B	216.718	213.748	213.196	210.479	179.439		21/LK	0.632	0.043	0.083	0.06	0.023	2.222	26.03	36.29
10-I	0.0199826	0.022086	0.0197723	0.874817	0.118213		T0-C	217.683	215.97	214.695	207.838	178.379		WS	0.008	0.079	0.175	0.164	0.011	1.582	27.12	36.35
5-I	0.0119896	0.0159861	0.0121999	0.513027	0.0942338		Dark-A	220.393	202.974	199.522	187.103	160.751		57	0.622	0.043	0.056	0.006	0.05	57.745	31.05	35.09
100-A	0.038	0.436	0.317	3.056	0.89		Dark-B	220.329	203.309	201.79	187.873	157.699		54	0.196	0.049	0	0	0.007	3.595	30.93	28.9
100-B							Dark-C	219.907	204.003	201.856	187.488	159.056
100-C							Screen-A	223.247	212.673	220.41	206.847	215.992
20-A	0.0580547	0.123892	0.0980199	1.8506	0.248205		Screen-B	224.474	213.196	220.167	207.135	213.815
20-B	0.0750925	0.108747	0.0982303	1.74774	0.278074		Screen-C	225.4	214.695	222.398	208.282	213.174
20-C	0.0731994	0.102016	0.0959165	1.88425	0.259353
10-A	0.0189309	0.0727788	0.0542686	1.20926	0.16575
10-B	0.0216654	0.0740408	0.0723581	1.03342	0.178581
10-C	0.0260826	0.0618409	0.0649961	1.16488	0.135882
5-A	0.014724	0.0391238	0.0351273	0.858831	0.136723
5-B	0.0136723	0.0536375	0.0412273	0.852311	0.121999
5-C	0.0136723	0.0262929	0.0321825	0.77196	0.132306

## Sheet: WS18218
Cruise Code: WS18218
Cruise Start Date: 08/06/2018
Dilution Experiments							Primary production experiments (light-dark bottles)
Chlorophyll a concnetrations (µg chl a L-1)							O2 concentrations (umol/L)								Enviromental data
	MR	21/LK	WS	57	54			MR	21/LK	WS	57	54			NH4 (uM)	PO4 (uM)	NOx (uM)	NO3 (uM)	NO2 (uM)	Si (uM)	Temp (℃)	Salinity
100-I				0.69	3.174		T0-A	210.271		237.002	222.753	204.782		MR	1.346	0.031	0	0	0.038	1.092	29.65	36.31
20-I				0.202603	0.5686		T0-B	210.692		235.579	221.755	204.989		21/LK	0.385	0	0	0	0.008	0.95	29.9	36.24
10-I				0.102143	0.288927		T0-C	207.731		238.425	220.4	204.006		WS	0.406	0.045	0	0	0.014	1.007	29.86	36.28
5-I				0.0994503	0.15801		Dark-A	202.824		209.99	207.099	190.273		57	1.174	0.215	0.413	0.355	0.058	15.199	30.75	35.66
100-A				0.669	1.959		Dark-B	202.602		210.561	206.137	189.662		54	0.171	0	0.279	0.222	0.057	48.651	30.4	32
100-B							Dark-C	203.507		208.698	206.985	189.039
100-C							Screen-A	209.361		217.632	232.309	226.542
20-A				0.236762	0.910197		Screen-B	210.247		218.437	231.693	227.174
20-B				0.264023	0.897913		Screen-C	211.826		218.032	231.883	226.612
20-C				0.280514	0.95378
10-A				0.188131	0.594682
10-B				0.212194	0.593841
10-C				0.171977	0.518454
5-A				0.117624	0.305082
5-B				0.0967579	0.269408
5-C				0.136639	0.296163

## Sheet: WS18285
Cruise Code: WS18285
Cruise Start Date: 10/12/2018
Dilution Experiments							Primary production experiments (light-dark bottles)
Chlorophyll a concnetrations (µg chl a L-1)							O2 concentrations (umol/L)								Enviromental data
	MR	21/LK	WS	57	54			MR	21/LK	WS	57	54			NH4 (uM)	PO4 (uM)	NOx (uM)	NO3 (uM)	NO2 (uM)	Si (uM)	Temp (℃)	Salinity
100-I	0.42	0.263	0.622	1.782	2.272		T0-A	201.203	197.179	186.952	201.453	180.089		MR	0.329	0	0	0	0.008	0.01	29.29	36.11
20-I	0.0799304	0.0609995	0.115268	0.234112	0.603895		T0-B	201.271	196.969	186.16	198.444	177.364		21/LK	0.364	0.011	0.387	0.387	0	0	28.88	35.25
10-I	0.0405962	0.0328135	0.0574237	0.12894	0.29427		T0-C	201.189	196.616	185.153	197.162	180.799		WS	0.455	0	0	0	0.024	0.469	29.02	36.58
5-I	0.0241895	0.0235584	0.0294481	0.0662581	0.15923		Dark-A	99.146	199.922	177.333	198.152	190.805		57	1.204	0.009	0.002	0	0.034	6.885	29.05	37.45
100-A	0.245	0.086	1.87	1.673	3.136		Dark-B	97.123	195.46	176.121	195.716	187.379		54	3.908	0.015	2.594	2.203	0.391	52.259	29.62	35.55
100-B							Dark-C	95.793	194.684	177.287	195.932	186.152
100-C							Screen-A	193.172	198.851	186.448	207.358	193.619
20-A	0.12242	0.175006	0.439828	0.779111	0.586437		Screen-B	193.02	204.961	187.111	MISSING	195.456
20-B	0.12242	0.184681	0.360739	0.655009	0.536586		Screen-C	192.869	201.523	185.786	MISSING	194.559
20-C	0.112323	0.169116	0.360739	0.745246	0.544368
10-A	0.0713064	0.0933924	0.236215	0.445507	0.598216
10-B	0.0677305	0.105592	0.231588	MISSING	0.677095
10-C	0.0654167	0.103699	0.254095	0.460652	0.605157
5-A	0.0437514	0.0620513	0.127468	0.264191	2.13814
5-B	0.0357583	0.0511134	0.12263	0.240633	2.10764
5-C	0.0469065	0.0525858	0.132096	MISSING	2.25425
5-C

## Sheet: WS18351
Cruise Code: WS18351
Cruise Start Date: 12/17/2018
Dilution Experiments							Primary production experiments (light-dark bottles)
Chlorophyll a concnetrations (µg chl a L-1)							O2 concentrations (umol/L)								Enviromental data
	MR	21/LK	WS	57	54			MR	21/LK	WS	57	54			NH4 (uM)	PO4 (uM)	NOx (uM)	NO3 (uM)	NO2 (uM)	Si (uM)	Temp (℃)	Salinity
100-I	0.449	0.314	0.276				T0-A	206.439	204.469	200.932				MR	0.995	0.024	0.138	0.114	0.296	0.002	24.92	36.42
20-I	0.0917096	0.0603685	0.0514289				T0-B	206.7	203.573	201.328				21/LK	1.177	0.006	0.077	0.071	0.352	0.014	25.06	36.39
10-I	0.0464859	0.0319722	0.027555				T0-C	206.962	205.364	201.052				WS	1.685	0	0.029	0.029	0.346	0.021	25.47	36.31
5-I	0.0243998	0.0151447	0.0164068				Dark-A	202.167	207.926	201.414				57
100-A	0.427	0.273	0.378				Dark-B	202.691	206.809	201.717				54
100-B							Dark-C	203.149	208.509	201.733
100-C							Screen-A	206.703	212.591	204.885
20-A	0.162595	0.115478	0.0866614				Screen-B	206.68	210.42	204.849
20-B	0.15313	0.124103	0.08582				Screen-C	206.64	210.445	205.037
20-C	0.164068	0.124103	0.0820339
10-A	0.0893959	0.0601582	0.0515341
10-B	0.0740408	0.0647857	0.0441721
10-C	0.0727788	0.0660478	MISSING
5-A	0.0460652	0.0309205	0.0254515
5-B	0.0475376	0.0336549	0.0763546
5-C	0.0378618	0.0340756	0.0271343

## Sheet: WS19028
Cruise Code: WS19028
Cruise Start Date: 01/28/2019
Dilution Experiments							Primary production experiments (light-dark bottles)
Chlorophyll a concnetrations (µg chl a L-1)							O2 concentrations (umol/L)								Enviromental data
	MR	21/LK	WS	57	54			MR	21/LK	WS	57	54			NH4 (uM)	PO4 (uM)	NOx (uM)	NO3 (uM)	NO2 (uM)	Si (uM)	Temp (℃)	Salinity
100-I	0.578	0.548	0.616	1.969	7.807		T0-A	215.546	209.129	213.871	242.371	237.649		MR	1.105	0.01	0.325	0.315	0.139	0.044	23.4	36.35
20-I	0.118213	0.11632	0.114847	0.438776	1.47787		T0-B	209.771	204.692	212.541	241.869	242.687		21/LK	1.193	0.016	0.279	0.263	0.058	0.067	22.51	36.45
10-I	0.0591064	0.0572134	0.0548996	0.203192	0.799515		T0-C	210.168	211.921	211.211	241.413	241.22		WS	1.406	0.047	0.756	0.709	0.065	0.009	22.16	36.47
5-I	0.0342859	0.0319722	0.0315515	0.114006	0.416269		Dark-A	214.916	213.038	215.227	224.14	242.727		57	2.125	0.068	0	0	0.205	0.013	17.73	35.16
100-A	0.429	0.664	0.863	1.583	9.443		Dark-B	213.317	214.486	215.048	224.257	249.862		54	28.897	0.187	0.353	0.166	0.527	0.026	17.55	30.37
100-B							Dark-C	215.696	214.183	215.064	224.465	242.564
100-C							Screen-A	215.307	215.628	217.018	238.451	266.685
20-A	0.193095	0.159019	0.221491	0.378407	2.26413		Screen-B	219.275	212.262	217.009	239.977	267.453
20-B	0.180895	0.168485	0.21434	0.387452	2.47006		Screen-C	215.65	217.881	217.252	239.246	267.062
20-C	0.184681	0.170588	0.216233	0.396918	2.31567
10-A	0.0786684	0.0776166	0.110641	0.220019	1.36176
10-B	0.101175	0.0748822	0.120316	0.225067	1.36155
10-C	0.0830856	0.0755132	0.10412	0.206347	1.1735
5-A	0.0824545	0.049641	0.0612099	0.124103	0.692871
5-B	0.0452238	0.0414376	0.0614202	0.124523	0.708646
5-C	0.0477479	0.0561616	0.0565823	0.116109	0.704229

## Sheet: WS19119
Cruise Code: WS19119
Cruise Start Date: 04/29/2019
Dilution Experiments							Primary production experiments (light-dark bottles)
Chlorophyll a concnetrations (µg chl a L-1)							O2 concentrations (umol/L)								Enviromental data
	MR	21/LK	WS	57	54			MR	21/LK	WS	57	54			NH4 (uM)	PO4 (uM)	NOx (uM)	NO3 (uM)	NO2 (uM)	Si (uM)	Temp (℃)	Salinity
100-I	0.112323	0.258091	0.30668	1.18918	8.63564		T0-A	221.13	228.517	214.168	209.109	211.961		MR	0.269	0.009	0.068	0.068	0	0.777	26.85	36.56
20-I	0.0267136	0.0662581	0.0624719	0.310046	1.7042		T0-B	222.267	253.787	210.424	209.002	210.842		21/LK	0.346	0	0.031	0.005	0.026	1.85	27.39	36.73
10-I	0.0151447	0.0336549	0.0323929	0.167223	0.774694		T0-C	221.621	221.945	212.487	208.894	209.884		WS	0.303	0	0.31	0.232	0.078	1.823	27.22	36.66
5-I	0.00988613	0.0204033	0.0197723	0.107485	0.446769		Dark-A	203.178	209.166	208.345	195.014	201.036		57	0.493	0.028	0.07	0.06	0.01	13.06	28.04	35.14
100-A	0.176373	0.41995	0.496305	1.14374	5.68715		Dark-B	203.073	211.197	207.32	195.036	201.814		54	14.135	0.039	0.246	0.123	0.123	86.898	28.17	33.15
100-B							Dark-C	203	213.293	209.357	194.806	201.093
100-C							Screen-A	212.797	216.317	214.657	209.046	231.282
20-A	0.0679409	0.186785	0.193095	0.479898	1.63815		Screen-B	214.853	215.873	212.876	208.987	230.588
20-B	0.0584754	0.203507	0.177635	0.433517	1.51153		Screen-C	213.113	217.668	212.24	209.608	231.764
20-C	0.0681512	0.198354	0.17448	0.453921	1.58094
10-A	0.0326032	0.136933	0.119265	0.37073	1.02395
10-B	0.0351273	0.123682	0.099913	0.324349	1.02069
10-C	0.0376514	0.134094	0.117582	0.348539	1.25386
5-A	0.0216654	0.0649961	0.0664685	0.200036	0.758813
5-B	0.0230326	0.0725684	0.0640495	0.213709	0.810873
5-C	0.0230326	0.0766701	0.0683615	0.218547	0.754711

## Sheet: WS19210
Cruise Code: WS19210
Cruise Start Date: 07/29/2019
Dilution Experiments							Primary production experiments (light-dark bottles)
Chlorophyll a concnetrations (µg chl a L-1)							O2 concentrations (umol/L)								Enviromental data
	MR	21/LK	WS	57	54			MR	21/LK	WS	57	54			NH4 (uM)	PO4 (uM)	NOx (uM)	NO3 (uM)	NO2 (uM)	Si (uM)	Temp (℃)	Salinity
100-I	0.33066	0.264717	0.134725	1.89467			T0-A	195.3	195.287	197.362	192.831	196.94		MR	0.365	0	0.026	0.025	0.001	0.153	30.15	35.2
20-I	0.0615875	0.0431204	0.0269239	0.339408			T0-B	191.566	195.993	197	192.361	195.946		21/LK	0.129	0.084	0	0	0	0.195	30.175	35.37
10-I	0.0333897	0.0282474	0.0111482	0.14021			T0-C	196.399	196.698	196.959	192.833	193.8		WS	0	0	0	0	0	0.197	29.85	35.46
5-I	0.0203314	0.015957	0.00837166	0.0883442			Dark-A	183.095	204.034	211.767	184.41	178.732		57	0	0	0.423	0.423	0	10.265	31.196	35.363
100-A	0.376409	0.258407	0.230326	MISSING			Dark-B	182.896	207.107	208.451	184.487	178.974		54	0	0.054	0.357	0.098	0.259	102.151	30.156	32.64
100-B							Dark-C	183.294	206.824	215.492	184.205	178.347
100-C							Screen-A	188.172	210.18	210.232	196.163	230.753
20-A	0.0302894	0.0896062	0.0296584	0.376324			Screen-B	188.357	200.41	212.743	195.954	230.345
20-B	0.0277653	0.0805568	0.036179	0.319538			Screen-C	187.966	190.64	209.263	196.378	229.14
20-C	0.0273073	0.0745124	0.0286067	0.312991
10-A	0.0186154	0.0401756	0.0290693	0.243976
10-B	0.0162394	0.0348074	0.00967579	0.11022
10-C	0.0186485	0.0369357	0.028817	0.159702
5-A	0.0102598	0.0344497	0.0267136	0.170374
5-B	0.0167705	0.0229701	0.0158328	0.175214
5-C	0.0155399	0.0319728	0.0191412	0.275215

[truncated: 3 more sheets: WS19266, WS19322, WS20006]
